# Supplementary material
Source: publisher figshare collection journal article supplement (https://asha.figshare.com/ndownloader/files/25667468)
Supplement: Supplementary file 1 [file 25667468]

## Supplemental Material S1. Telislife Questionnaire

| This questionnaire will evaluate your phone experience with your cochlear implant system. It contains 20 short items for which we ask you to evaluate how much the described situation is difficult or on the contrary how much easy it is for you. If you have the feeling that the described situation does not match your experience, you can chose the NA (not applicable) case. |                                                                                                               |                          |                          |                          |                          |                          |                          |
|--------------------------------------------------------------------------------------------------------------------------------------------------------------------------------------------------------------------------------------------------------------------------------------------------------------------------------------------------------------------------------------|---------------------------------------------------------------------------------------------------------------|--------------------------|--------------------------|--------------------------|--------------------------|--------------------------|--------------------------|
| 1                                                                                                                                                                                                                                                                                                                                                                                    | On the phone, <b>how difficult</b> is it to differentiate between a woman's voice and a child's voice (< 6y)? | Extremely difficult      | Very difficult           | Moderately difficult     | Slightly difficult       | Not difficult at all     | NA                       |
|                                                                                                                                                                                                                                                                                                                                                                                      |                                                                                                               | <input type="checkbox"/> |
| 2                                                                                                                                                                                                                                                                                                                                                                                    | On the phone, <b>how easy</b> is it to differentiate between a woman's voice and a man's voice?               | Extremely easy           | Very easy                | Moderately easy          | Slightly easy            | Not easy at all          | NA                       |
|                                                                                                                                                                                                                                                                                                                                                                                      |                                                                                                               | <input type="checkbox"/> |
| 3                                                                                                                                                                                                                                                                                                                                                                                    | On the phone, <b>how difficult</b> is it to recognize the voice of a family member?                           | Extremely difficult      | Very difficult           | Moderately difficult     | Slightly difficult       | Not difficult at all     | NA                       |
|                                                                                                                                                                                                                                                                                                                                                                                      |                                                                                                               | <input type="checkbox"/> |
| 4                                                                                                                                                                                                                                                                                                                                                                                    | On the phone, <b>how difficult</b> is it to recognize the voice of the person who is calling?                 | Extremely difficult      | Very difficult           | Moderately difficult     | Slightly difficult       | Not difficult at all     | NA                       |
|                                                                                                                                                                                                                                                                                                                                                                                      |                                                                                                               | <input type="checkbox"/> |
| 5                                                                                                                                                                                                                                                                                                                                                                                    | On the phone, <b>how difficult</b> is it to have a conversation in a quiet environment?                       | Extremely difficult      | Very difficult           | Moderately difficult     | Slightly difficult       | Not difficult at all     | NA                       |
|                                                                                                                                                                                                                                                                                                                                                                                      |                                                                                                               | <input type="checkbox"/> |
| 6                                                                                                                                                                                                                                                                                                                                                                                    | On the phone, <b>how difficult</b> is it to have a conversation when in a noisy environment?                  | Extremely difficult      | Very difficult           | Moderately difficult     | Slightly difficult       | Not difficult at all     | NA                       |
|                                                                                                                                                                                                                                                                                                                                                                                      |                                                                                                               | <input type="checkbox"/> |
| 7                                                                                                                                                                                                                                                                                                                                                                                    | On the phone, <b>how difficult</b> is it to have a conversation when other people are speaking around you?    | Extremely difficult      | Very difficult           | Moderately difficult     | Slightly difficult       | Not difficult at all     | NA                       |
|                                                                                                                                                                                                                                                                                                                                                                                      |                                                                                                               | <input type="checkbox"/> |
| 8                                                                                                                                                                                                                                                                                                                                                                                    | On the phone, <b>how difficult</b> is it to understand a member of your family?                               | Extremely difficult      | Very difficult           | Moderately difficult     | Slightly difficult       | Not difficult at all     | NA                       |
|                                                                                                                                                                                                                                                                                                                                                                                      |                                                                                                               | <input type="checkbox"/> |
| 9                                                                                                                                                                                                                                                                                                                                                                                    | On the phone, <b>how difficult</b> is it to understand someone that you do not know or know only very little? | Extremely difficult      | Very difficult           | Moderately difficult     | Slightly difficult       | Not difficult at all     | NA                       |
|                                                                                                                                                                                                                                                                                                                                                                                      |                                                                                                               | <input type="checkbox"/> |

|    |                                                                                                                                                             |                          |                          |                          |                          |                          |                          |
|----|-------------------------------------------------------------------------------------------------------------------------------------------------------------|--------------------------|--------------------------|--------------------------|--------------------------|--------------------------|--------------------------|
| 10 | On the phone, <b>how difficult</b> is it to understand someone when you do not know the topic of the conversation?                                          | Extremely difficult      | Very difficult           | Moderately difficult     | Slightly difficult       | Not difficult at all     | NA                       |
|    |                                                                                                                                                             | <input type="checkbox"/> |
| 11 | On the phone, <b>how difficult</b> is it to understand someone when you know in advance the topic of the discussion?                                        | Extremely difficult      | Very difficult           | Moderately difficult     | Slightly difficult       | Not difficult at all     | NA                       |
|    |                                                                                                                                                             | <input type="checkbox"/> |
| 12 | When receiving an incoming call, if you use only a sound alarm, <b>how easy</b> is it to hear it?                                                           | Extremely easy           | Very easy                | Moderately easy          | Slightly easy            | Not easy at all          | NA                       |
|    |                                                                                                                                                             | <input type="checkbox"/> |
| 13 | When listening to your received messages, <b>how difficult</b> is it to understand a message left by a relative / someone from your family?                 | Extremely difficult      | Very difficult           | Moderately difficult     | Slightly difficult       | Not difficult at all     | NA                       |
|    |                                                                                                                                                             | <input type="checkbox"/> |
| 14 | When listening to your received messages, <b>how difficult</b> is it to understand a message left by someone that you do not know or know only very little? | Extremely difficult      | Very difficult           | Moderately difficult     | Slightly difficult       | Not difficult at all     | NA                       |
|    |                                                                                                                                                             | <input type="checkbox"/> |
| 15 | When listening to your received messages, <b>how easy</b> is it to recognize the person who left you the message?                                           | Extremely easy           | Very easy                | Moderately easy          | Slightly easy            | Not easy at all          | NA                       |
|    |                                                                                                                                                             | <input type="checkbox"/> |
| 16 | When calling a relative / someone from your family, <b>how difficult</b> is it for him/her to understand you?                                               | Extremely difficult      | Very difficult           | Moderately difficult     | Slightly difficult       | Not difficult at all     | NA                       |
|    |                                                                                                                                                             | <input type="checkbox"/> |
| 17 | When calling someone that you do not know or only very little, <b>how difficult</b> is it for him/her to understand you?                                    | Extremely difficult      | Very difficult           | Moderately difficult     | Slightly difficult       | Not difficult at all     | NA                       |
|    |                                                                                                                                                             | <input type="checkbox"/> |
| 18 | When calling someone, <b>how easy</b> is it for you to make them perceive the mood you are into (angry, sad, happy, etc.)?                                  | Extremely easy           | Very easy                | Moderately easy          | Slightly easy            | Not easy at all          | NA                       |
|    |                                                                                                                                                             | <input type="checkbox"/> |
| 19 | When someone is calling you, <b>how difficult</b> is it for you to understand the mood he/she is into (angry, sad, happy, etc.)?                            | Extremely difficult      | Very difficult           | Moderately difficult     | Slightly difficult       | Not difficult at all     | NA                       |
|    |                                                                                                                                                             | <input type="checkbox"/> |
| 20 | In general, <b>how satisfied</b> are you with your phone experience using your cochlear implant?                                                            | Extremely satisfied      | Very satisfied           | Moderately satisfied     | Slightly satisfied       | Not satisfied at all     | NA                       |
|    |                                                                                                                                                             | <input type="checkbox"/> |

## Telislife Questionnaire: Scoring

The total score obtained to the Telislife questionnaire will be between 20 and 100 points. Each response corresponds to a numeric value:

|                     |                |                      |                    |                      |    |
|---------------------|----------------|----------------------|--------------------|----------------------|----|
| Extremely difficult | Very difficult | Moderately difficult | Slightly difficult | Not difficult at all | NA |
| 1                   | 2              | 3                    | 4                  | 5                    | 0  |

Report 20 values obtained for 20 questions of the questionnaire below:

| Number of the question                   | Score | Number of the question                    | Score |
|------------------------------------------|-------|-------------------------------------------|-------|
| Question 1                               |       | Question 11                               |       |
| Question 2 (reversed : 6 - resp = score) |       | Question 12 (reversed : 6 - resp = score) |       |
| Question 3                               |       | Question 13                               |       |
| Question 4                               |       | Question 14                               |       |
| Question 5                               |       | Question 15 (reversed : 6 - resp = score) |       |
| Question 6                               |       | Question 16                               |       |
| Question 7                               |       | Question 17                               |       |
| Question 8                               |       | Question 18 (reversed : 6 - resp = score) |       |
| Question 9                               |       | Question 19                               |       |
| Question 10                              |       | Question 20 (reversed : 6 - resp = score) |       |
| Total Score                              |       |                                           |       |
|                                          |       | = Sum of questions scores (1-20)          | /100  |

The questionnaire was separated in four subdomains:

- Speech recognition – favorable situations (questions 5, 8, 11, 13, 19)
- Speech recognition – complex situations (questions 6, 7, 9, 10, 14)
- Voice perception (questions 1, 2, 3, 4, 15)
- Vocal production (question 16, 17, 18)

Questions 12 and 20 refer to general satisfaction and are not included in the subdomains.
